# Supplementary material for: An in situ self-catalytic hybrid cyanate ester resin and its self-catalytic polymerization behavior
Source: Royal Society of Chemistry journal article supplement (doi:10.1039/c6ra15247c), 2016-01-01
Supplement: c6ra15247c1.pdf [file c6ra15247c1.pdf]

# An in-situ self-catalytic hybrid cyanate ester resin and its self- catalytic polymerization behavior

*Kangkang Guo*<sup>a,b</sup>, *Ping Li*<sup>b</sup>, *Yaping Zhu*<sup>a</sup>, *Fan Wang*<sup>c</sup>□, *Huimin Qi*<sup>a</sup>□

<sup>a</sup> Key Laboratory of Specially Functional Polymeric Materials and Related Technology of  
Ministry of Education, East China University of Science & Technology, Shanghai 200237,China

<sup>b</sup> State Key Laboratory of Chemical Engineering, East China University of Science & Technology,  
Shanghai 200237,China

<sup>c</sup> School of Materials Science and Engineering, East China University of Science & Technology,  
Shanghai 200237,China

□Corresponding authors: E-mail: [qihm@ecust.edu.cn](mailto:qihm@ecust.edu.cn) (H. Qi), [wangfan@ecust.edu.cn](mailto:wangfan@ecust.edu.cn) (F. Wang)

**Polymerization of Si-NCE-1 and Si-NCE-2**

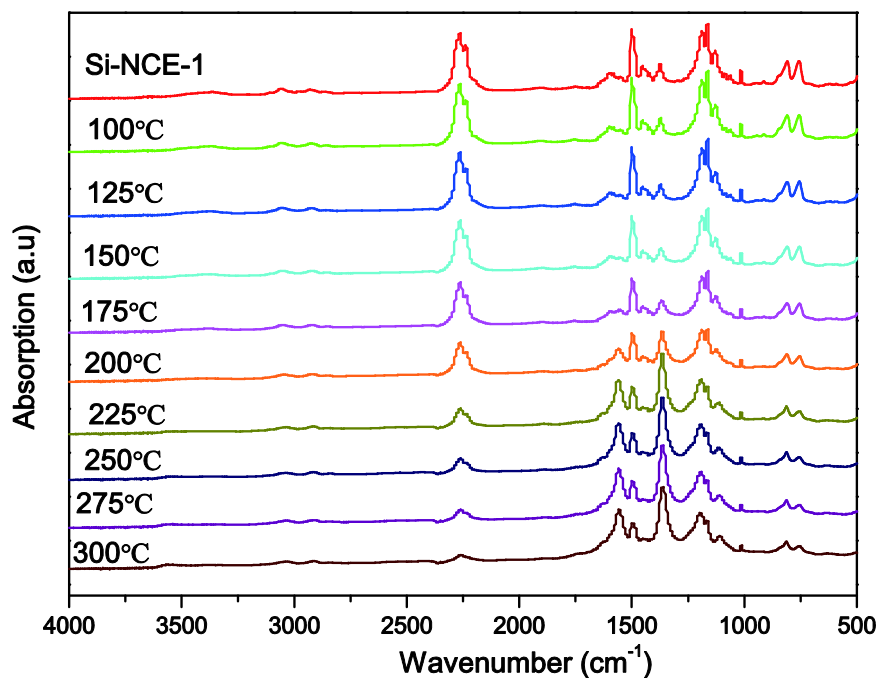

Figure 1S. FT-IR spectra of Si-NCE-1 at different temperature

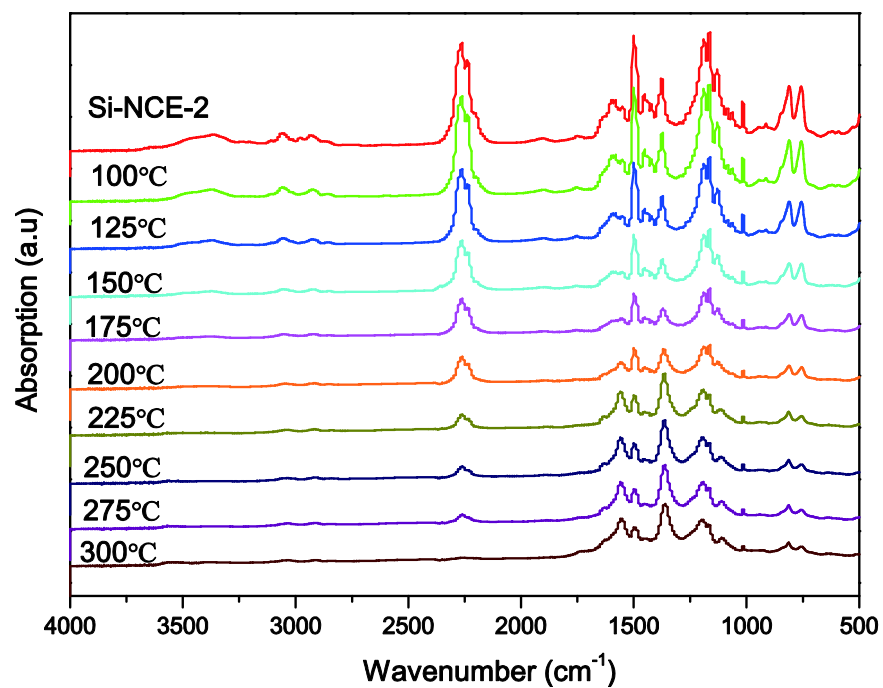

Figure 2S. FT-IR spectra of Si-NCE-2 at different temperature

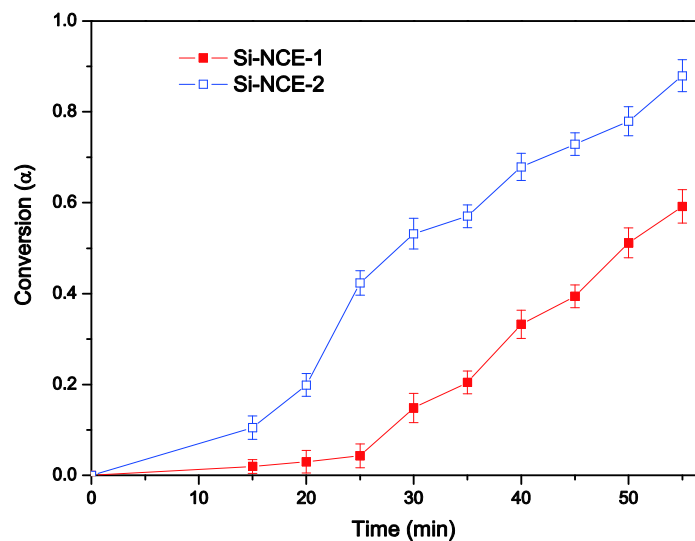

**Figure 3S.** The curve of conversion of group (-OCN) versus time for Si-NCE-1 and Si-NCE-2.

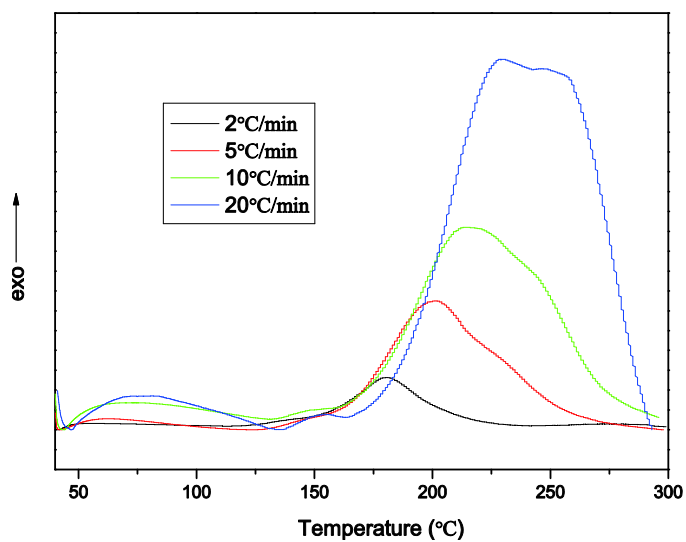

**Figure 4S.** DSC thermogram of Si-NCE-1 at different heating rate under N<sub>2</sub>.

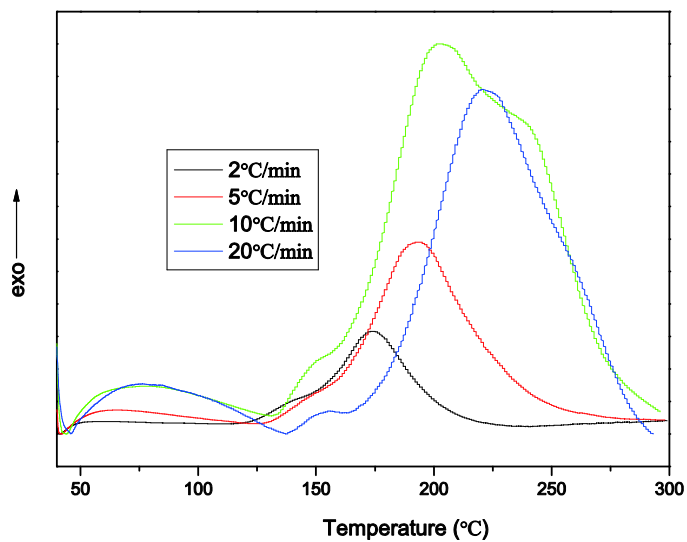

**Figure 5S.** DSC thermogram of Si-NCE-2 at different heating rate under N<sub>2</sub>.

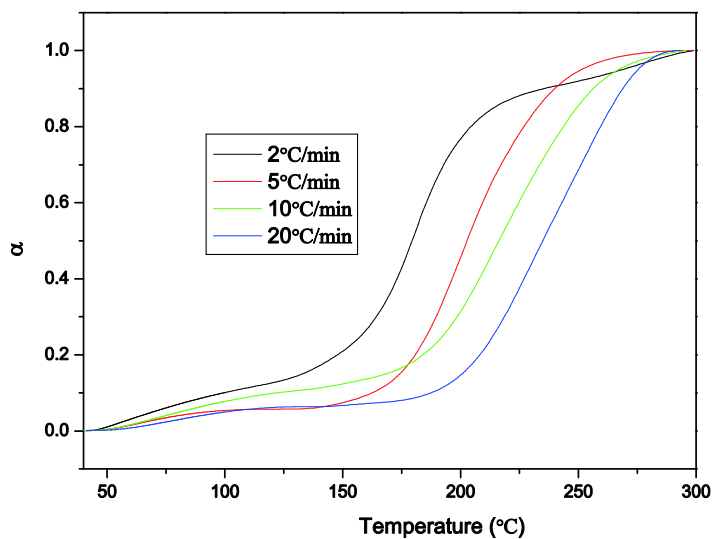

**Figure 6S.** The conversion of Si-NCE-1 versus temperature at different heating rate.

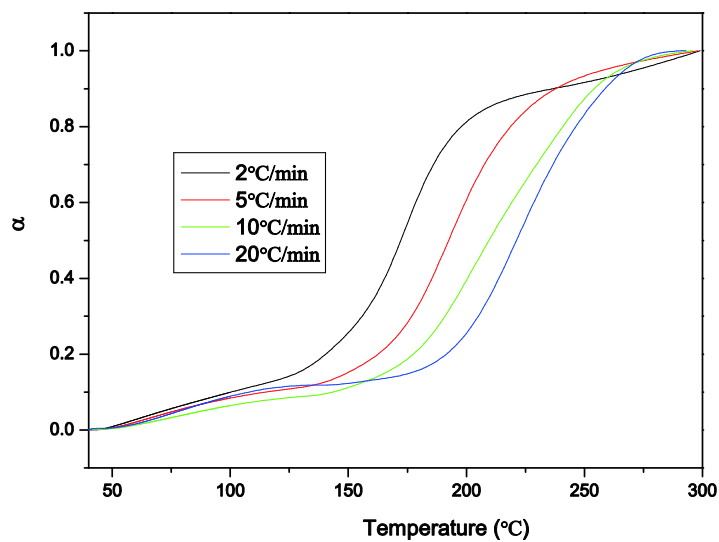

**Figure 7S.** The conversion of Si-NCE-2 versus temperature at different heating rate.

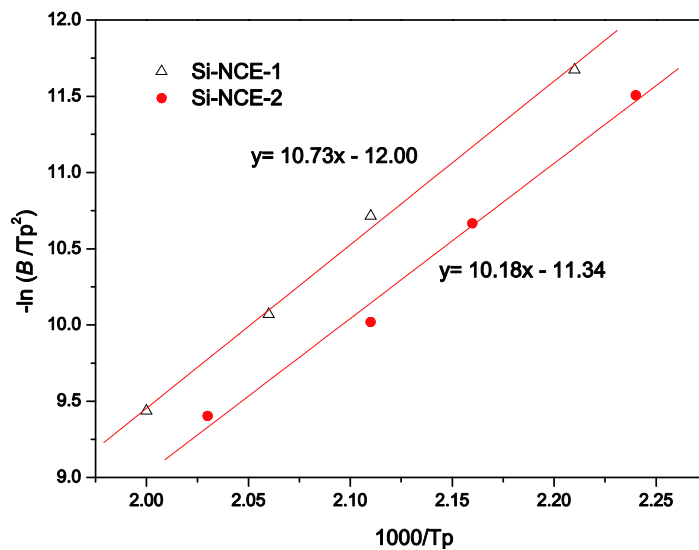

**Figure 8S.** Kissinger plot for determination of the activation energy of Si-NCE-1 and Si-NCE-2.

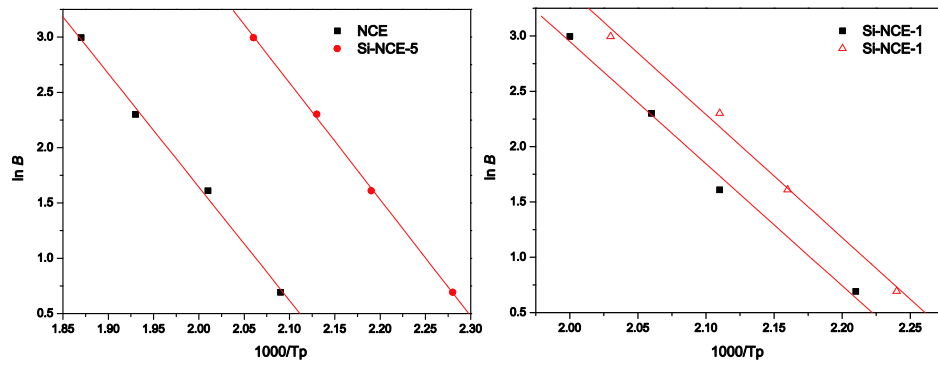

**Figure 9S.** Plots of  $\ln B$  vs.  $1000/T_p$  for hybrid NCE resins.

**Table 1S.** The kinetic parameter of hybrid NCE resins.

| Hybrid NCE | $E_a$ (activity energy) (KJ/mol) | n (order of curing reaction) | m (order of curing reaction) | Pre-exponential factor (A) ( $\text{min}^{-1}$ ) |
|------------|----------------------------------|------------------------------|------------------------------|--------------------------------------------------|
| NCE        | 93.83                            | 2.42                         | 1.01                         | $1.45 \times 10^9$                               |
| Si-NCE-1   | 89.21                            | 2.37                         | 0.99                         | $1.77 \times 10^9$                               |
| Si-NCE-2   | 84.64                            | 2.31                         | 0.99                         | $8.58 \times 10^8$                               |
| Si-NCE-5   | 80.31                            | 2.29                         | 0.98                         | $3.61 \times 10^8$                               |

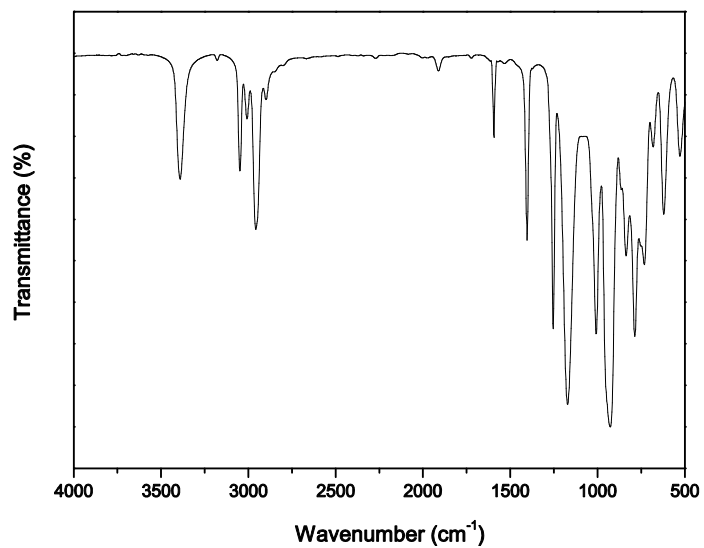

**Figure 10S.** FT-IR spectrum of the MVSZ.

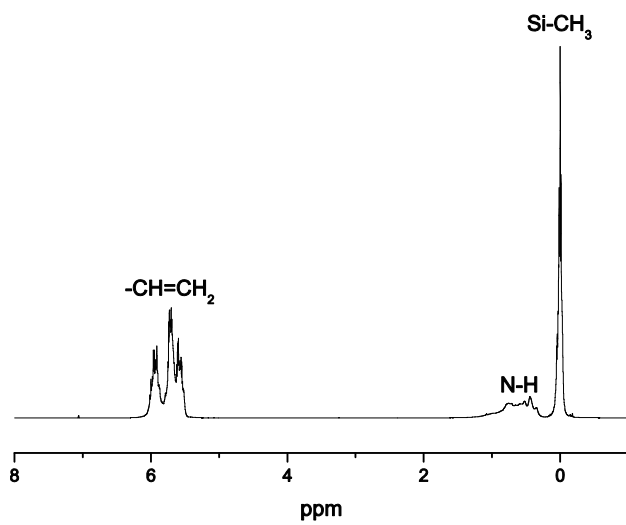

**Figure 11S.** <sup>1</sup>H-NMR spectrum of the MVSZ.
